# Supplementary material
Source: PubMed Central journal article supplement (PMC2532517)
Supplement: NIHMS61972-supplement-si20060901_121.pdf [file NIHMS61972-supplement-si20060901_121.pdf]

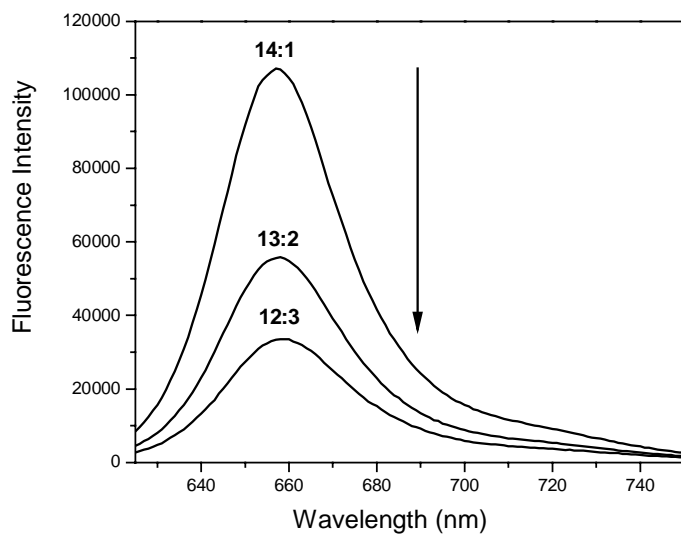

**Figure S1.** Fluorescence spectra recorded for DNA 3WJ samples containing different ratios of YO-PRO-1 and TO-PRO-3 (14:1, 13:2, and 12:3). Samples were excited at 620 nm, i.e. in the TO-PRO-3 absorption band. The emission at 600 nm is due to the TO-PRO-3. The observed decreasing intensity with increasing TO-PRO-3 concentration indicates self-quenching of the dye.
